# Supplementary material for: Identifying Lung Cancer Cell Markers with Machine Learning Methods and Single-Cell RNA-Seq Data
Source: MDPI journal article supplement (doi:10.3390/life11090940), 2021-09-09
Supplement: s1 [file s1]

# Guide for codes

## 1. Package dependencies

- scikit-learn 0.23 and later
- imbalanced-learn v0.6.2
- pandas
- Python 3.6 or newer

## 2. OS requirements

This package is supported for Linux/macOS/Windows 10. The package has been tested on the following systems:

- Linux: Ubuntu 20.04 LTS/CentOS 7.9
- Windows: Windows 10

## 3. Train a random forest with SMOTE based on scikit-learn

```
python sk-rf-kfold-smote-run.py --datapath inputfile -t 100 -d 1000 -e 100 -r 88 -k 10 -n 2
```

- -t: Number of trees in the forest.
- -d: The maximum depth of the tree. If none, nodes are expanded until all leaves are pure or until all leaves contain less than min\_samples\_split samples.
- -e: Number of training epochs.
- -k: Number of folds. Must be at least 2.
- -r: Pseudo-random number generator state used for shuffling.
- -n: Number of nearest neighbors to construct synthetic samples.
- --datapath: The path of dataset.

## 4. Train a decision tree with SMOTE based on scikit-learn

```
python sk-dt-smote-kfold-run.py -k 10 --datapath inputfile
```

- -k: Number of folds. Must be at least 2.
- --datapath: The path of dataset.

## 5. Note for utils.py

This package is for counting some measurements and called in sk-rf-kfold-smote-run.py and sk-dt-smote-kfold-run.py.
